## Thyrotropin Suppressive Therapy in Thyroid Carcinoma: What Are the Targets?

G. Brabant

Department of Endocrinology, Christie Hospital, Manchester M20 4BX, United Kingdom

Published guidelines on the treatment of thyroid carcinoma support TSH suppressive therapy as the standard of care for long-term follow-up after initial surgery and sequential radioiodine application (1, 2). This guidance based on large retrospective studies may be criticized on several grounds; in particular, they were not uniformly performed to current standards of surgical intervention, postoperative radioactive iodine treatment, standardized thyroxine preparations, or tailored TSH suppression using sensitive TSH assays (3). However, recent findings have largely resolved these uncertainties and confirm the beneficial effects of TSH suppressive treatment in patients with thyroid cancer (4, 5). Another important finding of these newer studies was that high-risk patients appear to respond better than patients carrying a low risk (5).

### Pathophysiological Basis of TSH Suppressive Therapy

The pathophysiological basis of this beneficial effect of TSH suppression seems straightforward considering the wealth of literature on the growth-promoting effects of TSH, both in animal models and in humans (6). An increased prevalence of thyroid cancer in patients with Graves' disease, even though still controversial, seems to support further the concept of TSH or thyroid-stimulating antibody dependency in thyroid carcinomas (7). Small series of patients suggest that the risk for cancer recurrence or metastatic disease may be increased in Graves' disease. However, available results from thyroid carcinoma raise a number of serious questions concerning TSH receptor expression, activation, and the cellular response to TSH stimulation. As enumerated in the following paragraphs, the data suggest the possibility of direct thyroid hormone-dependent cellular effects rather than TSH-mediated actions.

First, TSH receptor expression may be partly or completely lost in thyroid carcinomas. Durante *et al.* (8) recently confirmed previous studies demonstrating a substantial decrease in TSH receptor mRNA levels in thyroid carcinomas with a complete

loss in some of the most dedifferentiated tumors (7, 8). These findings were confirmed at the protein level with a complete loss of TSH receptor protein expression on Western blot analysis and a loss of TSH binding to the receptor preparation in some of the dedifferentiated tumors (9). These results cast serious doubt on a purely TSH driven effect, at least in dedifferentiated tumors.

Second, activation of the TSH receptor primarily induces a differentiation signal, and not a growth promoting, dedifferentiation signal. In an elegant study of patients treated preoperatively with TSH suppressive doses of thyroxine, markers of thyroid differentiation were significantly reduced compared with untreated controls (10). The effects of TSH on thyroid differentiation may explain why humans bearing constitutively active TSH receptor mutants do not have an increased rate of thyroid cancer. Furthermore, cell lines transfected with these mutant receptors show no consistent growth advantage compared with cells and transgenic animals with a constitutively active cAMP signaling pathway (11). Recent evidence suggests that the coupled regulation of growth and differentiation via the TSH receptor may be dominantly linked to the Gq/G11 coupled pathway. Transgenic animals with a thyroid specific knockout of the  $\alpha$ -subunit of Gq/G11 lose the ability for iodine organification and develop hypothyroidism (12). These transgenic animals have normal-sized thyroid glands at birth and during the first 1–2 months of age, which argues against an essential role of this pathway in thyroid growth, at least during development. However, Gq/G11 may link thyroid function to thyroid growth because the transgenic animals are not able to respond with thyroid growth to a goitrogen diet or to hypothyroidism. Thus, in normal physiology TSH stimulates a closely coupled differentiation and proliferation program. This can be reactivated in dedifferentiated thyroid carcinoma cells as exemplified recently (13). If undifferentiated thyroid carcinoma cells are treated with a reverse transcriptase inhibitor, proliferation of the cells is reduced. In parallel, the TSH receptor and the human sodium/iodide symporter are reexpressed. Furthermore, *in vitro* and *in vivo* TSH-stimulated iodine uptake is restored, indicating that proliferation

0021-972X/08/\$15.00/0

Printed in U.S.A.

Copyright © 2008 by The Endocrine Society

doi: 10.1210/jc.2007-2228 Received October 4, 2007. Accepted January 9, 2008.

Abbreviations: PI3K, Phosphatidylinositol 3-kinase; Pttg1, pituitary tumor transforming gene 1.

is not dominantly controlled by the presence of the TSH receptor (14).

Third, TSH alone is a weak stimulator of thyrocyte proliferation *in vitro* and requires cooperation with insulin/IGF-I for full effects (6). In dog thyrocytes, TSH stimulates the expression of IGF-I receptors, and more recent work demonstrates a facilitating mechanism of TSH on cell cycle regulation via cyclin-dependent kinases, with p27 supporting a permissive function of TSH on IGF-I dependent growth stimulatory mechanisms. The concept that thyroid growth is not necessarily dependant on TSH stimulation is further supported by results from TSH receptor knockout animals that develop normal-sized thyroid glands. These animals show defects in the expression of a differentiation gene, the human sodium/iodide symporter, and fail to concentrate radioactive iodine in their glands (14). This may be mediated via a link to Gq/G11 signaling, which, as discussed previously, will impact on growth regulation, and can be activated by other known growth regulators such as epidermal growth factor and IGF-I.

### Potential “Non-TSH” Driven Mechanisms

All these data question the importance of a TSH-mediated effect on tumor growth and aggressiveness. But what is the potential alternative mechanism behind the positive clinical effect seen with TSH suppressive therapy? With the known differentiation favoring effects of  $T_3$ , a direct  $T_3$  receptor-dependent action on the tumor may serve as another, admittedly speculative, explanation. Recent findings of Cheng and colleagues (15–17) indicate such a direct  $T_3$  mediated effect on thyroid proliferation at various levels, including phosphatidylinositol 3-kinase (PI3K), peroxisome proliferator activated receptor  $\gamma$ , and gelsolin. In experiments focused on the interaction of the  $T_3$  receptor with pituitary tumor transforming gene 1 (Pttg1), these investigators showed that only the liganded normal  $T_3$  receptor, but not the unliganded form or a mutated receptor, acts as an optimal degradation signal for Pttg1. This has important consequences because Pttg1 potentially stimulates an increase in transforming activity, induces hyperplasia, proliferation, and dedifferentiation in thyrocytes and other epithelial cells (18). Pttg1 expression is increased in thyroid carcinomas both on an mRNA level and immunohistochemically, and this has been related to nodal and distant metastases. TSH receptor activation may increase Pttg1 expression, but the expression of the protein is under the dominant control of various growth factors targeting the PI3K/AKT and MAPK/ERK signaling pathways (19). Mutations activating either pathway are frequently linked to the proliferation and aggressiveness of thyroid carcinomas. Although there is clearly much more work necessary, the current available data would fit the hypothesis of a direct  $T_3$ - $T_3$  receptor mediated action on Pttg1 acting as a downstream inhibitor of PI3K or MAPK signaling without a need to interact with TSH. Further direct, TSH independent, effects of thyroid hormones on the thyroid have been described. Thyroid fibroblast growth factor receptor expression appears to be controlled by  $T_3$  receptor action on its promoter, and mutated forms of the  $T_3$  receptor directly activate

PI3K signaling and induce thyroid carcinomas in a mouse model (20). These findings are consistent with the idea that the concentration of  $T_3$  within the tumor tissue is mediating the beneficial effects of thyroxine therapy, rather than TSH suppression *per se*. If this hypothesis is confirmed, measurement of circulating thyroid hormone levels, a better definition of their currently undefined uptake by tumor tissue (no data on thyroid hormone transporters are currently available), and local regulation through intratumor activation by deiodinases (21) may be more important for the long-term outcome of thyroid hormone therapy than the degree of TSH suppression. Serum TSH levels would only serve as a marker for the tissue effect of thyroid hormones. Furthermore, if this proposition is correct, it would support the testing of specific  $T_3$  analogs to target  $T_3$  receptor in tumor tissue rather than heart or bone, which are currently the most important targets for side effects of TSH suppressive therapy (22).

### Acknowledgments

Address all correspondence and requests for reprints to: Professor G. Brabant, M.D., Ph.D., F.R.C.P., Department of Endocrinology, Christie Hospital, Wilmslow Road, Manchester M20 4BX, United Kingdom. E-mail: georg.brabant@manchester.ac.uk.

Disclosure Statement: G.B. received lecture fees from Sanofi-Aventis and Merck-Serono SA, Germany.

### References

- Cooper DS, Doherty GM, Haugen BR, Kloos RT, Lee SL, Mandel SJ, Mazzaferri EL, McIver B, Sherman SI, Tuttle RM 2006 The American Thyroid Association Guidelines Taskforce. Management guidelines for patients with thyroid nodules and differentiated thyroid cancer. *Thyroid* 16:109–142
- Pacini F, Schlumberger M, Dralle H, Elisei R, Smit JW, Wiersinga W 2006 European Thyroid Cancer Taskforce. European consensus for the management of patients with differentiated thyroid carcinoma of the follicular epithelium. *Eur J Endocrinol* 154:787–803
- McGriff NJ, Csako G, Gourgoutis L, Lori CG, Pucino F, Sarlis NJ 2002 Effects of thyroid hormone suppression therapy on adverse clinical outcomes in thyroid cancer. *Ann Med* 34:554–564
- Eustatia-Rutten CF, Corssmit EP, Biermasz NR, Pereira AM, Romijn JA, Smit JW 2006 Survival and death causes in differentiated thyroid carcinoma. *J Clin Endocrinol Metab* 91:313–319
- Jonklaas J, Sarlis NJ, Litofsky D, Ain KB, Bigos ST, Brierley JD, Cooper DS, Haugen BR, Ladenson PW, Wagner J, Robbins J, Ross DS, Skarulis M, Maxon HR, Sherman SI 2006 Outcomes of patients with differentiated thyroid carcinoma following initial therapy. *Thyroid* 16:1229–1242
- Kimura T, Van Keymeulen A, Golstein J, Fusco A, Dumont JE, Roger PP 2001 Regulation of thyroid cell proliferation by TSH and other factors: a critical evaluation of *in vitro* models. *Endocr Rev* 22:631–656
- Belfiori A, Russo D, Vigneri R, Filetti S 2001 Graves' disease, thyroid nodules and thyroid cancer. *Clin Endocrinol (Oxf)* 55:711–718
- Durante C, Puxeddu E, Ferretti E, Morisi R, Moretti S, Bruno R, Barbi F, Avenia N, Scipioni A, Verrienti A, Tosi E, Cavaliere A, Gulino A, Filetti S, Russo D 2007 BRAF mutations in papillary thyroid carcinomas inhibit genes involved in iodine metabolism. *J Clin Endocrinol Metab* 92:2840–2843
- Potter E, Horn R, Scheumann GF, Dralle H, Costagliola S, Ludgate M, Vassart G, Dumont JE, Brabant G 1994 Western blot analysis of thyrotropin receptor expression in human thyroid tumours and correlation with TSH-binding. *Biochem Biophys Res Commun* 205:361–367
- Bruno R, Ferretti E, Tosi E, Arturi F, Giannasio P, Mattei T, Scipioni A, Presta I, Morisi R, Gulino A, Filetti S, Russo D 2005 Modulation of thyroid-specific gene expression in normal and nodular human thyroid tissues from adults: an *in vivo* effect of thyrotropin. *J Clin Endocrinol Metab* 90:5692–5697
- Fuhrer D, Lewis MD, Alkhafaji F, Starkey K, Paschke R, Wynford-Thomas D, Eggo M, Ludgate M 2003 Biological activity of activating thyroid-stimulating

- hormone receptor mutants depends on the cellular context. *Endocrinology* 144:4018–4030
12. Kero J, Ahmed K, Wettschureck N, Tunaru S, Wintermantel T, Greiner E, Schutz G, Offermanns S 2007 Thyrocyte-specific G(q)/G(11) deficiency impairs thyroid function and prevents goiter development. *J Clin Invest* 117:2399–2407
  13. Landriscina M, Fabiano A, Altamura S, Bagala C, Piscazzi A, Cassano A, Spadafora C, Giorgino F, Barone C, Cignarelli M 2005 Reverse transcriptase inhibitors down-regulate cell proliferation *in vitro* and *in vivo* and restore thyrotropin signaling and iodine uptake in human thyroid anaplastic carcinoma. *J Clin Endocrinol Metab* 90:5663–5671
  14. Marians RC, Ng L, Blair HC, Unger P, Graves PN, Davies TF 2002 Defining thyrotropin-dependent and -independent steps of thyroid hormone synthesis by using thyrotropin receptor-null mice. *Proc Natl Acad Sci USA* [Erratum (2005) 102:515] 99:15776–15781
  15. Ying H, Furuya F, Zhao L, Araki O, West BL, Hanover JA, Willingham MC, Cheng SY 2006 Aberrant accumulation of PTTG1 induced by a mutated thyroid hormone  $\beta$  receptor inhibits mitotic progression. *J Clin Invest* 116:2972–2984
  16. Kato Y, Ying H, Zhao L, Furuya F, Araki O, Willingham MC, Cheng SY 2006 PPAR $\gamma$  insufficiency promotes follicular thyroid carcinogenesis via activation of the nuclear factor- $\kappa$ B signaling pathway. *Oncogene* 25:2736–2747
  17. Kim CS, Furuya F, Ying H, Kato Y, Hanover JA, Cheng SY 2007 Gelsolin: a novel thyroid hormone receptor- $\beta$  interacting protein that modulates tumor progression in a mouse model of follicular thyroid cancer. *Endocrinology* 148:1306–1312
  18. Vlotides G, Eigler T, Melmed S 2007 Pituitary tumor-transforming gene: physiology and implications for tumorigenesis. *Endocr Rev* 28:165–186
  19. Saez C, Martinez-Brocca MA, Castilla C, Soto A, Navarro E, Tortolero M, Pintor-Toro JA, Japon MA 2006 Prognostic significance of human pituitary tumor-transforming gene immunohistochemical expression in differentiated thyroid cancer. *J Clin Endocrinol Metab* 91:1404–1409
  20. Furuya F, Ying H, Zhao L, Cheng SY 2007 Novel functions of thyroid hormone receptor mutants: beyond nucleus-initiated transcription. *Steroids* 72:171–179
  21. Takano T, Miyauchi A, Ito Y, Amino N 2006 Thyroxine to triiodothyronine hyperconversion thyrotoxicosis in patients with large metastases of follicular thyroid carcinoma. *Thyroid* 16:615–618
  22. Brenta G, Danzi S, Klein I 2007 Potential therapeutic applications of thyroid hormone analogs. *Nat Clin Pract Endocrinol Metab* 3:632–640
